# Supplementary material for: A Max-margin Model for Predicting Residue–base Contacts in Protein–RNA Interactions
Source: bioRxiv or medRxiv preprint supplement (doi:10.1101/022459), 2021-10-02
Supplement: Supplementary file [file 022459-1.pdf]

# Supplementary material of “ A max-margin model for predicting residue-base contacts in protein-RNA interactions ”

Kengo Sato<sup>1,\*</sup>

Shunya Kashiwagi<sup>1</sup>

Yasubumi Sakakibara<sup>1</sup>

## S1 Derivation of scoring functions for max-margin training

The loss function of the prediction  $\hat{z}$  against the positive data  $z$  (Eq. (14) in the main paper) can be transformed into the following using binary-valued variables:

$$\begin{aligned}
 \Delta(z, \hat{z}) &= \delta^{\text{FN residue}} (\# \text{ of false negative residues}) \\
 &\quad + \delta^{\text{FP residue}} (\# \text{ of false positive residues}) \\
 &\quad + \delta^{\text{FN base}} (\# \text{ of false negative bases}) \\
 &\quad + \delta^{\text{FP base}} (\# \text{ of false positive bases}) \\
 &\quad + \delta^{\text{FN contact}} (\# \text{ of false negative contacts}) \\
 &\quad + \delta^{\text{FP contact}} (\# \text{ of false positive contacts}) \\
 &= \delta^{\text{FN residue}} \sum_{i=1}^{N_p} I(x_i = 1)I(\hat{x}_i = 0) + \delta^{\text{FP residue}} \sum_{i=1}^{N_p} I(x_i = 0)I(\hat{x}_i = 1) \\
 &\quad + \delta^{\text{FN base}} \sum_{j=1}^{N_r} I(y_j = 1)I(\hat{y}_j = 0) + \delta^{\text{FP base}} \sum_{j=1}^{N_r} I(y_j = 0)I(\hat{y}_j = 1) \\
 &\quad + \delta^{\text{FN contact}} \sum_{i=1}^{N_p} \sum_{j=1}^{N_r} I(z_{ij} = 1)I(\hat{z}_{ij} = 0) + \delta^{\text{FP contact}} \sum_{i=1}^{N_p} \sum_{j=1}^{N_r} I(z_{ij} = 0)I(\hat{z}_{ij} = 1) \\
 &= \sum_{i=1}^{N_p} \left\{ \delta^{\text{FN residue}} x_i(1 - \hat{x}_i) + \delta^{\text{FP residue}} (1 - x_i)\hat{x}_i \right\} \\
 &\quad + \sum_{j=1}^{N_r} \left\{ \delta^{\text{FN base}} y_j(1 - \hat{y}_j) + \delta^{\text{FP base}} (1 - y_j)\hat{y}_j \right\} \\
 &\quad + \sum_{i=1}^{N_p} \sum_{j=1}^{N_r} \left\{ \delta^{\text{FN contact}} z_{ij}(1 - \hat{z}_{ij}) + \delta^{\text{FP contact}} (1 - z_{ij})\hat{z}_{ij} \right\}.
 \end{aligned}$$

Here,  $I(x_i = 1)I(\hat{x}_i = 0) = 1$  if  $\hat{x}_i$  is a false negative and 0 otherwise, and  $I(x_i = 0)I(\hat{x}_i = 1) = 1$  if  $\hat{x}_i$  is a false positive and 0 otherwise. We also use the fact that  $I(x_i = 1) = x_i$  and  $I(x_i = 0) = 1 - x_i$ .

\*to whom correspondence should be addressed

<sup>1</sup>Department of Biosciences and Informatics, Keio University, 3-14-1 Hiyoshi, Kohoku-ku, Yokohama 223-8522, Japan

Therefore, the first term of Eq. (13) in the main paper can be simplified into:

$$\begin{aligned}
f_{\lambda}(P, R, \hat{z}) + \Delta(z, \hat{z}) &= \sum_{i=1}^{N_p} u_i \hat{x}_i + \sum_{j=1}^{N_r} v_j \hat{y}_j + \sum_{i=1}^{N_p} \sum_{j=1}^{N_r} w_{ij} \hat{z}_{ij} \\
&+ \sum_{i=1}^{N_p} \left\{ \delta^{\text{FN residue}} x_i (1 - \hat{x}_i) + \delta^{\text{FP residue}} (1 - x_i) \hat{x}_i \right\} \\
&+ \sum_{j=1}^{N_r} \left\{ \delta^{\text{FN base}} y_j (1 - \hat{y}_j) + \delta^{\text{FP base}} (1 - y_j) \hat{y}_j \right\} \\
&+ \sum_{i=1}^{N_p} \sum_{j=1}^{N_r} \left\{ \delta^{\text{FN contact}} z_{ij} (1 - \hat{z}_{ij}) + \delta^{\text{FP contact}} (1 - z_{ij}) \hat{z}_{ij} \right\} \\
&= \sum_{i=1}^{N_p} \left\{ \left[ u_i - \delta^{\text{FN residue}} x_i + \delta^{\text{FP residue}} (1 - x_i) \right] \hat{x}_i + \delta^{\text{FN residue}} x_i \right\} \\
&+ \sum_{j=1}^{N_r} \left\{ \left[ v_j - \delta^{\text{FN base}} y_j + \delta^{\text{FP base}} (1 - y_j) \right] \hat{y}_j + \delta^{\text{FN base}} y_j \right\} \\
&+ \sum_{i=1}^{N_p} \sum_{j=1}^{N_r} \left\{ \left[ w_{ij} - \delta^{\text{FN contact}} z_{ij} + \delta^{\text{FP contact}} (1 - z_{ij}) \right] \hat{z}_{ij} + \delta^{\text{FN contact}} z_{ij} \right\} \\
&= \sum_{i=1}^{N_p} \bar{u}_i \hat{x}_i + \sum_{j=1}^{N_r} \bar{v}_j \hat{y}_j + \sum_{i=1}^{N_p} \sum_{j=1}^{N_r} \bar{w}_{ij} \hat{z}_{ij} + \text{Const},
\end{aligned}$$

where

$$\begin{aligned}
\bar{u}_i &= u_i - \delta^{\text{FN residue}} x_i + \delta^{\text{FP residue}} (1 - x_i) \\
&= \begin{cases} u_i - \delta^{\text{FN residue}} & (\text{if } x_i=1) \\ u_i + \delta^{\text{FP residue}} & (\text{if } x_i=0) \end{cases} \\
\bar{v}_j &= v_j - \delta^{\text{FN base}} y_j + \delta^{\text{FP base}} (1 - y_j) \\
&= \begin{cases} v_j - \delta^{\text{FN base}} & (\text{if } y_j=1) \\ v_j + \delta^{\text{FP base}} & (\text{if } y_j=0) \end{cases} \\
\bar{w}_{ij} &= w_{ij} - \delta^{\text{FN contact}} z_{ij} + \delta^{\text{FP contact}} (1 - z_{ij}) \\
&= \begin{cases} w_{ij} - \delta^{\text{FN contact}} & (\text{if } z_{ij}=1) \\ w_{ij} + \delta^{\text{FP contact}} & (\text{if } z_{ij}=0) \end{cases} \\
\text{Const} &= \sum_{i=1}^{N_p} \delta^{\text{FN residue}} x_i + \sum_{j=1}^{N_r} \delta^{\text{FN base}} y_j + \sum_{i=1}^{N_p} \sum_{j=1}^{N_r} \delta^{\text{FN contact}} z_{ij}
\end{aligned}$$

The last equation indicates that we can maximize the first term of the objective function (13) by replacing scores  $u_i$ ,  $v_j$  and  $w_{ij}$  with a constant difference  $\text{Const}$  that is independent of  $\hat{x}_i$ ,  $\hat{y}_j$  and  $\hat{z}_{ij}$ .

## S2 The maximum number of contacts

To determine the upper bound of the number of contacts for each residue and base ( $X_i$  in Eq. (11) and  $Y_j$  in Eq. (12) in the main paper), we investigated the distribution of the number of contacts for each residue and base in the dataset assembled in our study. We predicted structural profiles for proteins and RNAs, then counted the contacts for each type of structural profiles. Tables S1 and S2 show the distributions of the number of contacts for each type of structural profiles. We determined the upper bound of the number of contacts for each structural profile such that it can cover the 90 % of contacts observed in our dataset.

Table S1: The number of contacts for each structural element of residues

| # of contacts | coil | $\alpha$ helix | $\beta$ sheet |
|---------------|------|----------------|---------------|
| 1             | 761  | 335            | 205           |
| 2             | 704  | 283            | 162           |
| 3             | 239  | 73             | 38            |
| 4             | 126  | 25             | 14            |
| 5             | 53   | 4              | 3             |
| 6             | 22   | 3              | 0             |
| 7             | 4    | 1              | 0             |

Table S2: The number of contacts for each structural element of bases

| # of contacts | bulge | external | hairpin | internal | multibranch | stack |
|---------------|-------|----------|---------|----------|-------------|-------|
| 1             | 9     | 35       | 100     | 57       | 228         | 339   |
| 2             | 5     | 36       | 66      | 44       | 138         | 229   |
| 3             | 4     | 21       | 47      | 24       | 74          | 174   |
| 4             | 3     | 27       | 31      | 23       | 66          | 112   |
| 5             | 2     | 23       | 18      | 14       | 34          | 67    |
| 6             | 0     | 17       | 8       | 6        | 13          | 33    |
| 7             | 0     | 15       | 11      | 1        | 6           | 9     |
| 8             | 0     | 7        | 4       | 0        | 2           | 2     |
| 9             | 0     | 8        | 1       | 0        | 2           | 2     |
| 10            | 0     | 3        | 2       | 0        | 0           | 0     |
| 11            | 0     | 0        | 1       | 0        | 0           | 0     |
| 12            | 0     | 0        | 1       | 0        | 0           | 0     |
| 13            | 0     | 0        | 0       | 0        | 0           | 0     |
| 14            | 0     | 1        | 0       | 0        | 0           | 0     |
| 15            | 0     | 1        | 1       | 0        | 0           | 0     |

Table S3: The number of residue features with non-zero weights

| Type                             | Context len. | # of features | > 0 | < 0 |
|----------------------------------|--------------|---------------|-----|-----|
| Residues                         | 3            | $20^3$        | 93  | 219 |
|                                  | 5            | $20^5$        | 96  | 224 |
| Simplified alphabets (10 groups) | 5            | $10^5$        | 94  | 224 |
|                                  | 7            | $10^7$        | 95  | 221 |
| Simplified alphabets (4 groups)  | 5            | $4^5$         | 56  | 161 |
|                                  | 7            | $4^7$         | 91  | 218 |
| Secondary structures             | 3            | $3^3$         | 1   | 14  |
|                                  | 5            | $3^5$         | 8   | 29  |

Table S4: The number of base features with non-zero weights

| Type                 | Context len. | # of features | > 0 | < 0 |
|----------------------|--------------|---------------|-----|-----|
| Bases                | 3            | $4^3$         | 0   | 64  |
|                      | 5            | $4^5$         | 34  | 223 |
| Secondary structures | 3            | $6^3$         | 0   | 34  |
|                      | 5            | $6^5$         | 4   | 81  |

### S3 Feature weights

Tables S3–S5 show the number of features with non-zero weights for each feature, indicating that only 10,594 features have non-zero weights (> 0: 2,870 and < 0: 7,724), while the number of potential features is more than 4 billion. This is because  $\ell_1$  regularization leads to sparse coding.

The 20 largest feature weights among all the features are shown in Table S6. The first two columns indicate the type of features for residues and bases. By contexts of features in the next two columns, each feature can be identified. The contexts of each feature is described by representative character codes as shown in Tables S7, S8 and S9 for structural profiles of residues and bases, simplified alphabets of 10 groups, and those of 4 groups, respectively. Table S6 suggests that the weight for long continuous coil regions in protein sequences have large positive values.

Table S5: The number of residue–base contact features with non-zero weights

| Type                             | Base                 | Context len. | # of features     | > 0 | < 0 |
|----------------------------------|----------------------|--------------|-------------------|-----|-----|
| Residue                          | Bases                | 3            | $20^3 \times 4^3$ | 251 | 562 |
|                                  |                      | 5            | $20^5 \times 4^5$ | 254 | 317 |
| Residues                         | Secondary structures | 3            | $3^3 \times 6^3$  | 0   | 412 |
|                                  |                      | 5            | $3^5 \times 6^5$  | 103 | 552 |
| Simplified alphabets (10 groups) | Bases                | 3            | $10^3 \times 4^3$ | 224 | 572 |
|                                  |                      | 5            | $10^5 \times 4^5$ | 253 | 324 |
| Simplified alphabets (10 groups) | Secondary structures | 3            | $10^3 \times 6^3$ | 231 | 640 |
|                                  |                      | 5            | $10^5 \times 6^5$ | 253 | 324 |
| Simplified alphabets (4 groups)  | Bases                | 3            | $4^3 \times 4^3$  | 123 | 491 |
|                                  |                      | 5            | $4^5 \times 4^5$  | 237 | 442 |
| Simplified alphabets (4 groups)  | Secondary structures | 3            | $4^3 \times 6^3$  | 107 | 460 |
|                                  |                      | 5            | $4^5 \times 6^5$  | 246 | 656 |

Table S6: Top 20 of feature weights

| Feature type                    |                      | Context |       | Weight   |
|---------------------------------|----------------------|---------|-------|----------|
| Residue                         | Base                 | Residue | Base  |          |
| Secondary structures            | Secondary structures | CCCCC   | SMMMM | 5.54003  |
| Secondary structures            | Secondary structures | CCCCC   | SSSSM | 5.43940  |
| Secondary structures            | —                    | CCCCC   | —     | 5.12261  |
| Secondary structures            | Secondary structures | CCCCC   | SSSSH | 4.68329  |
| Secondary structures            | Secondary structures | CCCCC   | MSSSS | 4.34785  |
| Secondary structures            | Secondary structures | CCCCC   | ISSSS | 3.71432  |
| Secondary structures            | Secondary structures | CCCCC   | HSSSS | 2.79177  |
| Secondary structures            | Secondary structures | CCCCC   | SSSSI | 2.56748  |
| Secondary structures            | Secondary structures | CCCCC   | MMMMS | 2.18214  |
| Secondary structures            | Secondary structures | CCCCC   | SHHHH | 2.11508  |
| Secondary structures            | Secondary structures | CCCCC   | HHHHS | 2.10132  |
| Secondary structures            | Secondary structures | CCCCC   | HHHHH | 1.86373  |
| Secondary structures            | Secondary structures | ECCCC   | SSSSS | 0.794036 |
| Simplified alphabets (4 groups) | Secondary structures | AEE     | SSS   | 0.540660 |
| Simplified alphabets (4 groups) | Secondary structures | EEE     | SSS   | 0.533426 |
| Simplified alphabets (4 groups) | Secondary structures | AEA     | SSS   | 0.516197 |
| Secondary structures            | —                    | CCC     | —     | 0.511168 |
| Simplified alphabets (4 groups) | Secondary structures | EEA     | SSS   | 0.506299 |
| Simplified alphabets (4 groups) | Secondary structures | AEF     | SSS   | 0.466757 |
| Secondary structures            | Secondary structures | CCCCC   | MMSSS | 0.448178 |

Table S7: Structural profiles coding

| Residue | $\alpha$ helix | $\beta$ sheet | Coil     |       |             |       |
|---------|----------------|---------------|----------|-------|-------------|-------|
|         | H              | E             | C        |       |             |       |
| Base    | External       | Hairpin       | Internal | Bulge | Multibranch | Stack |
|         | E              | H             | I        | B     | M           | S     |

Table S8: Coding of simplified alphabets (10 groups)

|             |      |   |   |   |    |   |     |      |    |   |
|-------------|------|---|---|---|----|---|-----|------|----|---|
| amino acids | LVIM | C | A | G | ST | P | FYW | EDNQ | KR | H |
| coding      | L    | C | A | G | S  | P | F   | E    | K  | H |

Table S9: Coding of simplified alphabets (4 groups)

|             |       |       |     |         |
|-------------|-------|-------|-----|---------|
| amino acids | LVIMC | AGSTP | FYW | EDNQKRH |
| coding      | L     | A     | F   | E       |

## S4 Dataset

Table S10 shows PDB IDs and chain IDs used in our dataset.

Table S10: PDB ID and chain IDs used in our dataset

| PDBID | Protein chain | RNA chain |
|-------|---------------|-----------|
| 1A9N  | C             | R         |
| 1AV6  | A             | B         |
| 1C0A  | A             | B         |
| 1DDL  | A             | D         |
| 1DDL  | A             | E         |
| 1DFU  | P             | M         |
| 1DFU  | P             | N         |
| 1DI2  | A             | C         |
| 1DI2  | A             | D         |
| 1DI2  | A             | E         |
| 1F7U  | A             | B         |
| 1FEU  | A             | B         |
| 1FEU  | A             | C         |
| 1FEU  | A             | E         |
| 1FJG  | M             | A         |
| 1FXL  | A             | B         |
| 1GAX  | A             | C         |
| 1GTF  | L             | W         |
| 1H4S  | A             | T         |
| 1HQ1  | A             | B         |
| 1J1U  | A             | B         |
| 1JBS  | A             | C         |
| 1JID  | A             | B         |
| 1K8W  | A             | B         |
| 1M8W  | A             | C         |
| 1M8W  | A             | E         |
| 1MMS  | A             | C         |
| 1N78  | A             | C         |
| 1OOA  | A             | C         |
| 1Q2R  | A             | E         |
| 1QF6  | A             | B         |
| 1SDS  | C             | D         |
| 1SDS  | C             | F         |
| 1SER  | A             | T         |
| 1VQ8  | 1             | 0         |
| 1VQ8  | 3             | 0         |
| 1VQ8  | A             | 0         |
| 1VQ8  | B             | 0         |
| 1VQ8  | C             | 0         |
| 1VQ8  | D             | 0         |
| 1VQ8  | D             | 9         |
| 1VQ8  | E             | 0         |
| 1VQ8  | H             | 0         |
| 1VQ8  | H             | 9         |
| 1VQ8  | J             | 0         |
| 1VQ8  | K             | 0         |

Table S10: PDB ID and chain IDs used in our dataset (cont.)

| PDBID | Protein chain | RNA chain |
|-------|---------------|-----------|
| 1VQ8  | L             | 0         |
| 1VQ8  | M             | 0         |
| 1VQ8  | N             | 0         |
| 1VQ8  | N             | 9         |
| 1VQ8  | O             | 0         |
| 1VQ8  | P             | 0         |
| 1VQ8  | Q             | 0         |
| 1VQ8  | Q             | 9         |
| 1VQ8  | R             | 0         |
| 1VQ8  | U             | 0         |
| 1VQ8  | V             | 0         |
| 1VQ8  | W             | 0         |
| 1VQ8  | W             | 9         |
| 1VQ8  | X             | 0         |
| 1WPU  | A             | C         |
| 1YZ9  | A             | C         |
| 1YZ9  | A             | D         |
| 1YZ9  | A             | E         |
| 1YZ9  | A             | F         |
| 1ZH5  | A             | C         |
| 1ZH5  | A             | D         |
| 1ZHO  | A             | B         |
| 1ZHO  | A             | H         |
| 2A8V  | A             | D         |
| 2ANR  | A             | B         |
| 2ASB  | A             | B         |
| 2BGG  | A             | P         |
| 2BGG  | A             | Q         |
| 2BU1  | A             | R         |
| 2E9T  | A             | B         |
| 2E9T  | A             | C         |
| 2FK6  | A             | R         |
| 2FMT  | A             | C         |
| 2GIC  | A             | R         |
| 2J01  | I             | A         |
| 2J01  | R             | A         |
| 2Q66  | A             | X         |
| 2R8S  | L             | R         |
| 2VQE  | B             | A         |
| 2VQE  | C             | A         |
| 2VQE  | D             | A         |
| 2VQE  | F             | A         |
| 2VQE  | G             | A         |
| 2VQE  | H             | A         |
| 2VQE  | I             | A         |
| 2VQE  | J             | A         |
| 2VQE  | K             | A         |
| 2VQE  | N             | A         |
| 2VQE  | P             | A         |

Table S10: PDB ID and chain IDs used in our dataset (cont.)

| PDBID | Protein chain | RNA chain |
|-------|---------------|-----------|
| 2VQE  | R             | A         |
| 2VQE  | S             | A         |
| 2VQE  | T             | A         |
| 2ZUE  | A             | B         |
| 3GIB  | A             | H         |
| 3IEV  | A             | D         |



Table S11: Accuracy under varying  $\delta^{\text{FN}^*}$  with fixing  $\delta^{\text{FP}^*} = 1.0$  and  $C = 0.125$ .

| $\delta^{\text{FN}^*}$ | Contacts |        |        | Binding residues |        |        | Binding bases |        |        |
|------------------------|----------|--------|--------|------------------|--------|--------|---------------|--------|--------|
|                        | PPV      | SEN    | F      | PPV              | SEN    | F      | PPV           | SEN    | F      |
| $2^0$                  | 0.4468   | 0.5836 | 0.4883 | 0.5269           | 0.6351 | 0.5543 | 0.5455        | 0.6405 | 0.5612 |
| $2^1$                  | 0.4722   | 0.5890 | 0.5076 | 0.5573           | 0.6494 | 0.5765 | 0.5588        | 0.6220 | 0.5618 |
| $2^2$                  | 0.4797   | 0.5759 | 0.5051 | 0.5766           | 0.6555 | 0.5861 | 0.5653        | 0.6192 | 0.5585 |
| $2^3$                  | 0.4810   | 0.5494 | 0.4922 | 0.5804           | 0.6368 | 0.5793 | 0.5727        | 0.5925 | 0.5481 |
| $2^4$                  | 0.4814   | 0.4938 | 0.4592 | 0.5856           | 0.6039 | 0.5608 | 0.5740        | 0.5326 | 0.5063 |

Table S12: Accuracy under varying  $C$  with fixing  $\delta^{\text{FP}^*} = 1.0$  and  $\delta^{\text{FN}^*} = 4.0$ .

| $C$      | Contacts |        |        | Binding residues |        |        | Binding bases |        |        |
|----------|----------|--------|--------|------------------|--------|--------|---------------|--------|--------|
|          | PPV      | SEN    | F      | PPV              | SEN    | F      | PPV           | SEN    | F      |
| $2^{-4}$ | 0.4862   | 0.5666 | 0.5041 | 0.5806           | 0.6528 | 0.5927 | 0.5693        | 0.6038 | 0.5509 |
| $2^{-3}$ | 0.4797   | 0.5759 | 0.5051 | 0.5766           | 0.6555 | 0.5861 | 0.5653        | 0.6192 | 0.5585 |
| $2^{-2}$ | 0.4738   | 0.5123 | 0.4766 | 0.5740           | 0.5696 | 0.5475 | 0.5555        | 0.5626 | 0.5406 |
| $2^{-1}$ | 0.4395   | 0.5247 | 0.4592 | 0.5388           | 0.5924 | 0.5399 | 0.5345        | 0.5971 | 0.5389 |
| $2^0$    | 0.4235   | 0.5204 | 0.4489 | 0.5173           | 0.5951 | 0.5321 | 0.5173        | 0.5921 | 0.5212 |
| $2^1$    | 0.4226   | 0.4957 | 0.4381 | 0.5155           | 0.5574 | 0.5113 | 0.5158        | 0.5600 | 0.5116 |

## S5 Hyperparameters

We empirically chose the hyperparameters for the max-margin training: the penalty for positives  $\delta^{\text{FN}^*}$ , the penalty for negatives  $\delta^{\text{FP}^*}$ , and the weight for  $\ell_1$  regularization term  $C$ . We fixed  $\delta^{\text{FP}^*} = 1.0$  because the balance between  $\delta^{\text{FN}^*}$  and  $\delta^{\text{FP}^*}$  is important. We performed the grid search on  $\delta^{\text{FN}^*} \in \{2^n \mid n = 0, \dots, 4\}$  and  $C \in \{2^n \mid n = -4, \dots, 1\}$  for the whole dataset. Then, we chose  $\delta^{\text{FN}^*} = 4.0$  and  $C = 0.125$  at which good accuracy can be achieved. Tables S11 and S12 show the accuracy under varying  $\delta^{\text{FN}^*}$  and  $C$  respectively, indicating that  $\delta^{\text{FN}^*}$  and  $C$  are not strongly sensitive to the prediction accuracy.
